# Supplementary material for: ATM-Mediated Transcriptional and Developmental Responses to γ-rays in Arabidopsis
Source: PubMed Central journal article supplement (PMC1855986; doi:10.1371/journal.pone.0000430), 2007-05-09

**Figure S6. General characteristics of radiomodulated genes in roots and seedlings.**

Because the transcriptional IR-response was concomitant with cell cycle delay, we assume it might include decisive gene information enabling a comprehensive view of the developmental phenotypes observed in WT and *atm* (Fig. 1-2). Therefore, the transcriptional content was upgraded by (i) an additional description of individual genes to identify putative orthologues of mammals and yeasts and or gene descriptions that were not in the *Arabidopsis* databases, (ii) a broad classification of the large number of radiomodulated genes into 9 categories dealing with major components of cell structure and biology, and (iii) the import of expression characteristics such as cell cycle peaking, root subzone(s)-expression (LEDs), or sets of transcripts constitutively or transiently expressed in mutants that are hypersensitive to DNA damaging agents (*CAF-1*, *Ku80*, *tebichi*, *E2Fa-DPa<sup>OE</sup>*). All data are in Table S3.

**(A)** Overview of analyzed unique genes. « Seedling » genes were only in clusters K1-K3 and K7 and clusters K4-K6 and K8 « Root » genes were only in clusters M3 and M7 and R2-R4 and clusters M4 and R5. « Root and seedling » included subsets of genes either up or downregulated the same way in seedlings and roots (intersection of K1-K3 and K7 with M3 and M7, and R2-R4 or intersection of K4-K6 and K8 with M4, and R5). Genes inversely regulated in roots and seedlings and genes K1M-K8M, LxM, RxM were discarded. **(B)**. LED distribution. « Reference » was the relative distribution of the 5717 genes in each LED characterized by Birnbaum et al. 2003. **(C)** Cell cycle phase-peaking distribution. « Reference » was the relative distribution of the 1462 genes peaking in each phase of the cell cycle characterized by Menges et al. 2005. **(D)** and **(E)** Functional distribution of upregulated and downregulated genes, respectively. 1 Chromatin, DNA, chromosome; 2 : RNA; 3 : protein fate ; 4 : general metabolism ; 5 : cell structure and physiology; 6 : transcription ; 7 stress and hormone-responsive; 8 : signaling ; 9 : unknown function (see Material and methods). Down radiomodulated genes in both “root” and “seedlings and roots” genes were enriched in LED 8-type and M phase-type, while they declined in LEDs6-7-type or G1 and S phase-type genes. Concomitantly, upregulated genes were enriched in S-phase genes without bias to a LED-type. LED8 and LEDs6-7 spanned all radial zones but peaked in the broad meristematic zone, and all root zones located above the meristematic zone. As LED8 and LEDs6-7 included genes involved in nuclear organization, cell cycle, and mitosis, or encoding kinases and transcription factors (TFs) associated with cell maturation, their IR-induced patterns indicate that all root zones experienced a general decline of proliferation and differentiation active in untreated plants, consistently with the penetrability and the toxicity of gamma rays. Concomitantly, the S-phase-type enrichment in upregulated genes show that IR also induced growth-promoting genes, therefore indicating either the asynchrony of cells, or both cell cycle arrest and preparation for re-entry into the cell cycle in the same cell. Upregulated “seedling” genes did not reveal the bias observed in roots, and were strongly enriched in metabolism genes (Class 4 in D-E), consistent with the specific physiology and infrequent cell division in cotyledons after germination compared to division-active roots.

**A**

|                   | IR-regulation | Analyzed | LED 1-8 | Cell cycle phase peaking | LED 8 and M phase peaking |
|-------------------|---------------|----------|---------|--------------------------|---------------------------|
| seedling          | up            | 888      | 303     | 64                       | 2                         |
|                   | down          | 456      | 187     | 57                       | 11                        |
| root and seedling | up            | 166      | 58      | 13                       | 0                         |
|                   | down          | 61       | 38      | 26                       | 13                        |
| root              | up            | 255      | 85      | 23                       | 2                         |
|                   | down          | 113      | 45      | 29                       | 10                        |
| Total no of genes |               | 1940     | 717     | 213                      | 38                        |

B

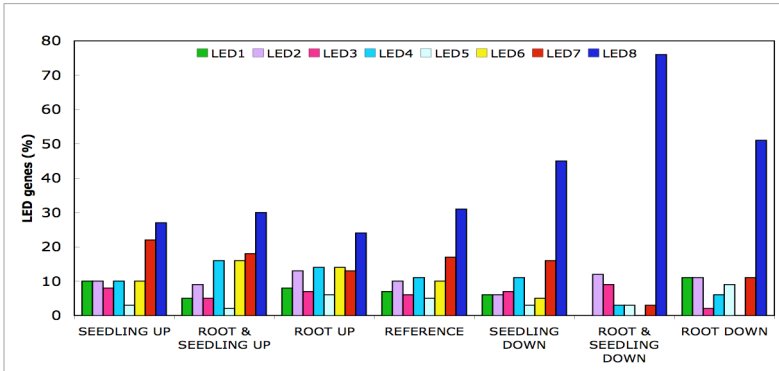

C

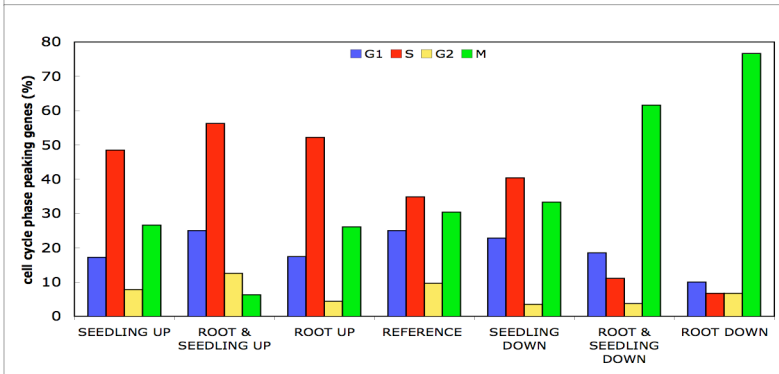

D

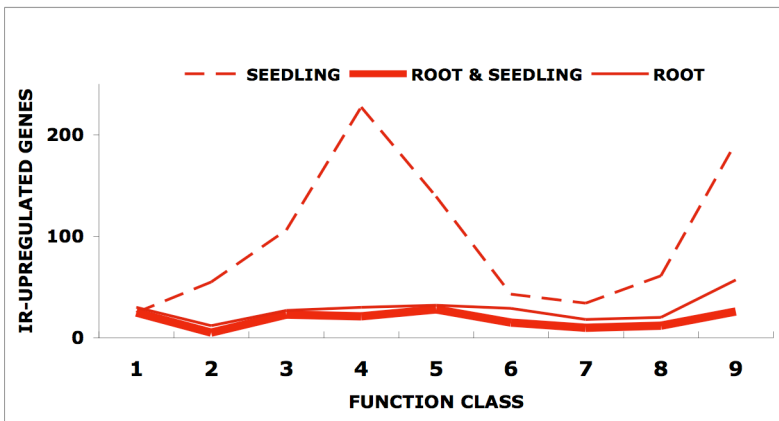

E

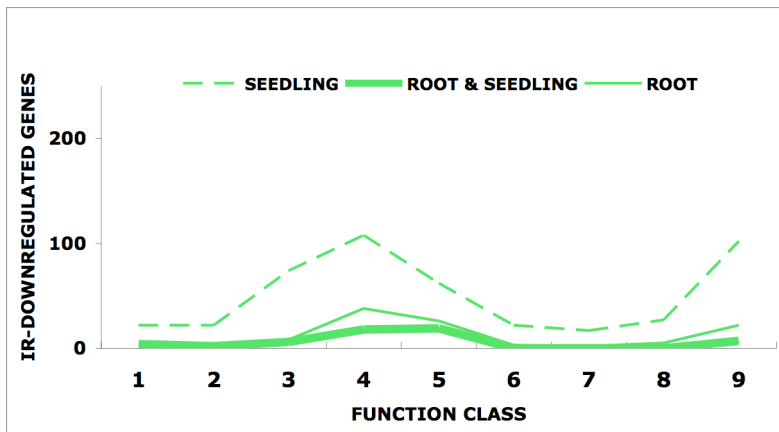

Supplement: pone.0000430.s006.pdf [file pone.0000430.s006.pdf]
