# Supplementary material for: ATM-Mediated Transcriptional and Developmental Responses to γ-rays in Arabidopsis
Source: PubMed Central journal article supplement (PMC1855986; doi:10.1371/journal.pone.0000430), 2007-05-09

**Figure S4. Data validation by rt-qPCR.**

(A) Fold-induction by rt-PCR vs fold induction by microarrays [2 exp(ratio)]. The expression levels of 51 genes listed in Table S6 were examined. (B) Time-course of the expression of three upregulated genes in *atm* and WT.

A

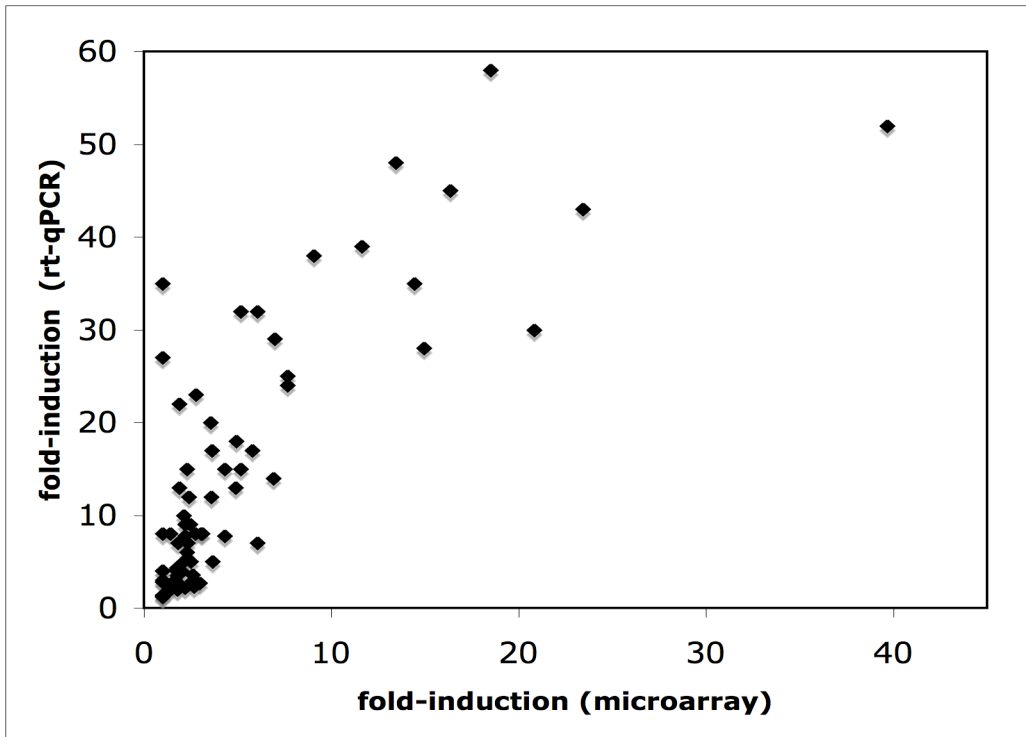

B

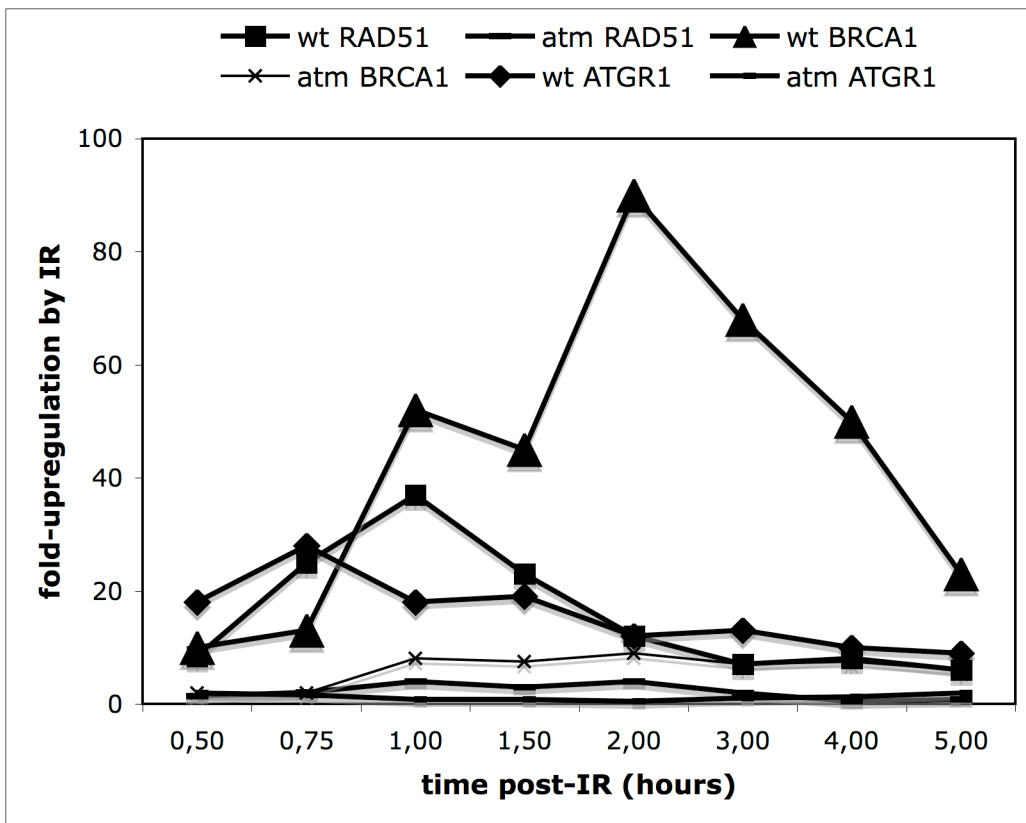

Supplement: pone.0000430.s004.pdf [file pone.0000430.s004.pdf]
